# Supplementary material for: Photophysical, electrochemical and anion sensing properties of Ru(ii) bipyridine complexes with 2,2′-biimidazole-like ligand
Source: Royal Society of Chemistry journal article supplement (doi:10.1039/c0dt01446j), 2011-01-01
Supplement: c0dt01446j.pdf [file c0dt01446j.pdf]

## Supplementary Information

for

# Photophysical, electrochemical and anion sensing properties of Ru(II) bipyridine complexes with 2, 2'-biimidazole-like ligands

Hao-Jun Mo, Yan-Li Niu, Mei Zhang and Zheng-Ping Qiao Bao-Hui Ye\*

MOE Key Laboratory of Bioinorganic and Synthetic Chemistry, School of Chemistry and Chemical Engineering, Sun Yat-Sen University, Guangzhou 510275, China. E-mail: cesybh@mail.sysu.edu.cn.

## Measurement Methods

Elemental (C, H, and N) analyses were performed on an Elementar Vario EL analyzer. Electrospray ionization mass spectra (ESI-MS) were obtained on a Thermo LCQ DECA XP mass spectrometer. <sup>1</sup>H NMR spectra were obtained on a Varian Mercury-Plus 300 spectrometer. Electronic absorption spectra were obtained with a Shimadzu UV-3150 spectrophotometer. Emission spectra were recorded on a Hitachi F-4500 fluorescence spectrometer. Electrochemical measurements were carried out with a CHI-630C electrochemistry system. pH measurements were performed with a Mettler Toledo S20P pH meter equipped with an InLab Science Pro electrode. NMR, UV, luminescence spectra and electrochemical properties were recorded at 298 K.

*pKa* Determination: A 50 cm<sup>3</sup> solution consisted of 40 % acetonitrile, 60 % water, 0.1 mol·dm<sup>-3</sup> phosphoric acid, and 6×10<sup>-5</sup> mol·dm<sup>-3</sup> **3** was prepared in a 25 °C titration vessel, magnetic stirring was employed during the whole experiment. 1 mol·dm<sup>-3</sup> NaOH aqueous solution was added dropwise into the vessel, after each addition, pH value and absorption spectra of the mixed solution were recorded. The *pKa* value was fitted from the equation below:<sup>1</sup>

$$pK_a = pH - \log \frac{A - A_{HA}}{A_{A^-} - A}$$

where *A*<sub>HA</sub>, *A*<sub>A<sup>-</sup></sub>, and *A* refer to the absorbances at the initial, final, and intermediate pH values at a given wavelength.

UV and Luminescence Titration: Quartz cuvettes with a 1 cm path length and a 3 cm<sup>3</sup> volume were used for all measurements. For a typical titration experiment, 3 μL aliquots of tetrabutylammonium (TBA)

salts of F<sup>-</sup>, OAc<sup>-</sup>, Cl<sup>-</sup>, Br<sup>-</sup>, I<sup>-</sup>, NO<sub>3</sub><sup>-</sup>, and HSO<sub>4</sub><sup>-</sup> (0.005 mol·dm<sup>-3</sup> in acetonitrile) were added to a 2.5 cm<sup>3</sup> solution of **3** (6×10<sup>-5</sup> mol·dm<sup>-3</sup> in acetonitrile). For luminescence titration, the excitation wavelength was 470 nm, the excitation slit width was maintained at 5 nm, and the emission slit width at 10 nm.

Quantum yields were determined in freeze-thaw-pump degassed solutions of the complexes by a relative method using [Ru(bpy)<sub>3</sub>]<sup>2+</sup> in the same solvent as the standard.<sup>2</sup> The quantum yields were calculated by the equation below:<sup>3</sup>

$$\Phi_r = \Phi_{\text{std}} \frac{A_{\text{std}} I_r \eta_r^2}{A_r I_{\text{std}} \eta_{\text{std}}^2}$$

where  $\Phi_r$  and  $\Phi_{\text{std}}$  are the quantum yields of unknown and standard samples ( $\Phi_{\text{std}} = 0.062$ ,<sup>4</sup> 298 K, in acetonitrile at  $\lambda_{\text{ex}} = 450$  nm),  $A_r$  and  $A_{\text{std}}$  are the solution absorbance at the excitation wavelength ( $\lambda_{\text{ex}}$ ),  $I_r$  and  $I_{\text{std}}$  are the integrated emission intensities, and  $\eta_r$  and  $\eta_{\text{std}}$  are the reflective indices of the solvent. Experimental errors in the reported luminescence quantum yields were about 20 %.

<sup>1</sup>H NMR Titration: 1.25  $\mu\text{L}$  aliquots of TBA salts of F<sup>-</sup>, OAc<sup>-</sup>, Cl<sup>-</sup>, Br<sup>-</sup>, I<sup>-</sup>, NO<sub>3</sub><sup>-</sup>, and HSO<sub>4</sub><sup>-</sup> (0.12 mol·dm<sup>-3</sup> in acetonitrile-*d*3) were added to a 400  $\mu\text{L}$  solution of **1**, **2** and **3** (0.003 mol·dm<sup>-3</sup> in acetonitrile-*d*3). Titration of **3** with F<sup>-</sup>, OAc<sup>-</sup> and OH<sup>-</sup> was also performed in DMSO-*d*6 solutions. Spectra were recorded after each addition, and the sample shaken thoroughly before each measurement.

Electrochemical measurements in acetonitrile: A three-electrode assembly comprising of a glassy carbon working electrode, a Pt auxiliary electrode, and a non-aqueous Ag/AgNO<sub>3</sub> reference electrode were used. The cyclic voltammetric (CV) and square wave voltammetric (SWV) measurements were carried out in acetonitrile solution of the complex (0.001 mol·dm<sup>-3</sup>) and the concentration of the supporting electrolyte (TBAPF<sub>6</sub>) was maintained at 0.1 mol·dm<sup>-3</sup>. Nitrogen was bubbled into the solution for 10 min and the glassy carbon electrode was polished with an alumina / water slurry before each measurement. A scan rate of 100 mV·s<sup>-1</sup> was employed for all measurements. The potentials obtained in acetonitrile were referenced against the Ag/AgNO<sub>3</sub> electrode, which under the given experimental conditions gave a value of 0.07 V for the Fc/Fc<sup>+</sup> couple. The  $E_{1/2}$  values were determined from CV using the relation  $E_{1/2} = 0.5(E_{\text{pc}} + E_{\text{pa}})$ , where  $E_{\text{pc}}$  and  $E_{\text{pa}}$  were cathodic and anodic potentials, respectively, and also directly obtained from the peak values of SWV curves.

The diagram of Ru<sup>2+/3+</sup> potential vs pH: A three-electrode assembly comprising of a glassy carbon working electrode, a Pt auxiliary electrode, and an aqueous Ag/AgCl reference electrode were used. The

$\text{Ru}^{2+/3+}$  potentials were obtained from SWV measurements, which were carried out in acetonitrile / water (2:3 / V:V) solution of **3** ( $0.001 \text{ mol}\cdot\text{dm}^{-3}$ ). Different buffer systems ( $0.1 \text{ mol dm}^{-3}$ ) were employed over different pH ranges: 0 – 2, perchlorate; 2 – 4, phthalate; 4 – 8, phosphate; 8 – 12, borate.<sup>5</sup> The potentials obtained in acetonitrile / water were referenced against the Ag/AgCl electrode, which under the given experimental conditions gave a value of 0.26 V for the Fc/Fc<sup>+</sup> couple (remained constant over the pH range 0 – 12).

**Table S1** Photophysical and Redox Properties of **1**, **2**, **3** and  $[\text{Ru}(\text{bpy})_3]^{2+}$  in acetonitrile at 298 K

|                                  | Abs, $\lambda_{\text{max}} / \text{nm}$ ( $10^{-4} \epsilon / \text{M}^{-1} \text{cm}^{-1}$ ) | Lum. $\lambda_{\text{max}} / \text{nm}$ | $\Phi_{\text{r}}^a$   | Oxid. $b / \text{V}$ | Red. $b / \text{V}$ |
|----------------------------------|-----------------------------------------------------------------------------------------------|-----------------------------------------|-----------------------|----------------------|---------------------|
| <b>1</b>                         | 290 (4.98), 341 (0.84), 475 (0.80)                                                            | 638 <sup>c</sup>                        | $4.5 \times 10^{-3}$  | 0.71                 | -1.86, -2.14, -2.24 |
| <b>2</b>                         | 290 (4.94), 330 (3.10), 348 (3.53), 465 (0.96)                                                | 624 <sup>c</sup>                        | $2.8 \times 10^{-3}$  | 0.73                 | -1.82, -2.08, -2.19 |
| <b>3</b>                         | 290 (5.01), 332 (3.35), 349 (3.54), 462 (1.08)                                                | 617 <sup>c</sup>                        | $2.8 \times 10^{-3}$  | 0.74                 | -1.80, -2.06, -2.18 |
| $[\text{Ru}(\text{bpy})_3]^{2+}$ | 287 (5.03), 450 (1.00)                                                                        | 597 <sup>d</sup>                        | $6.2 \times 10^{-2e}$ | 0.97                 | -1.65, -1.84, -2.10 |

<sup>a</sup> Estimated errors were about 20%. <sup>b</sup> vs. Ag/AgNO<sub>3</sub>, which gives  $E_{1/2} = 0.07 \text{ V}$  for Fc/Fc<sup>+</sup>. <sup>c</sup>  $\lambda_{\text{ex}} = 470 \text{ nm}$ . <sup>d</sup>  $\lambda_{\text{ex}} = 450 \text{ nm}$ . <sup>e</sup> Ref. 4

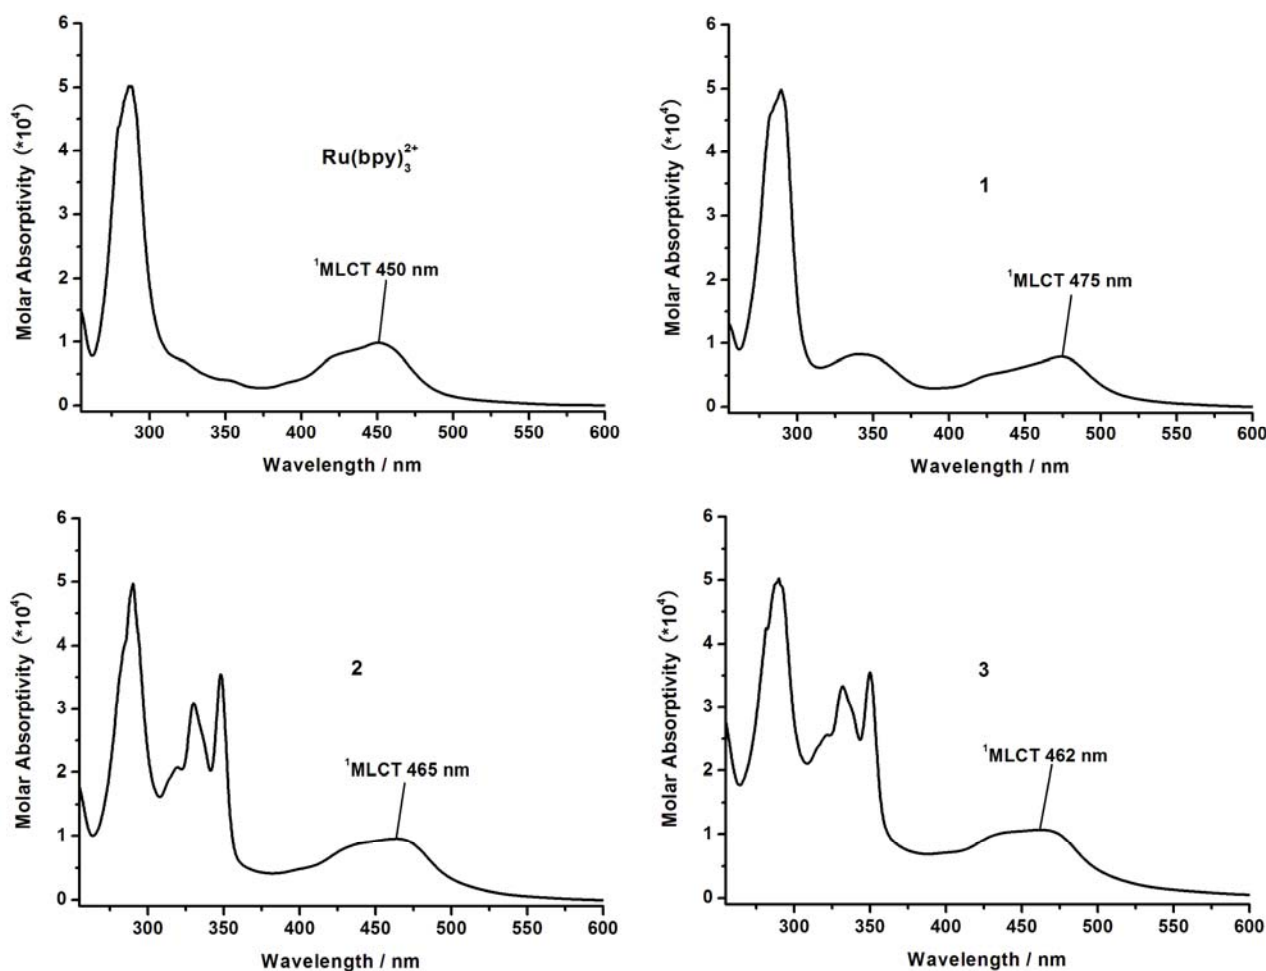

**Fig. S1** Absorption spectra of  $[\text{Ru}(\text{bpy})_3]^{2+}$ , **1**, **2** and **3** in acetonitrile at 298 K

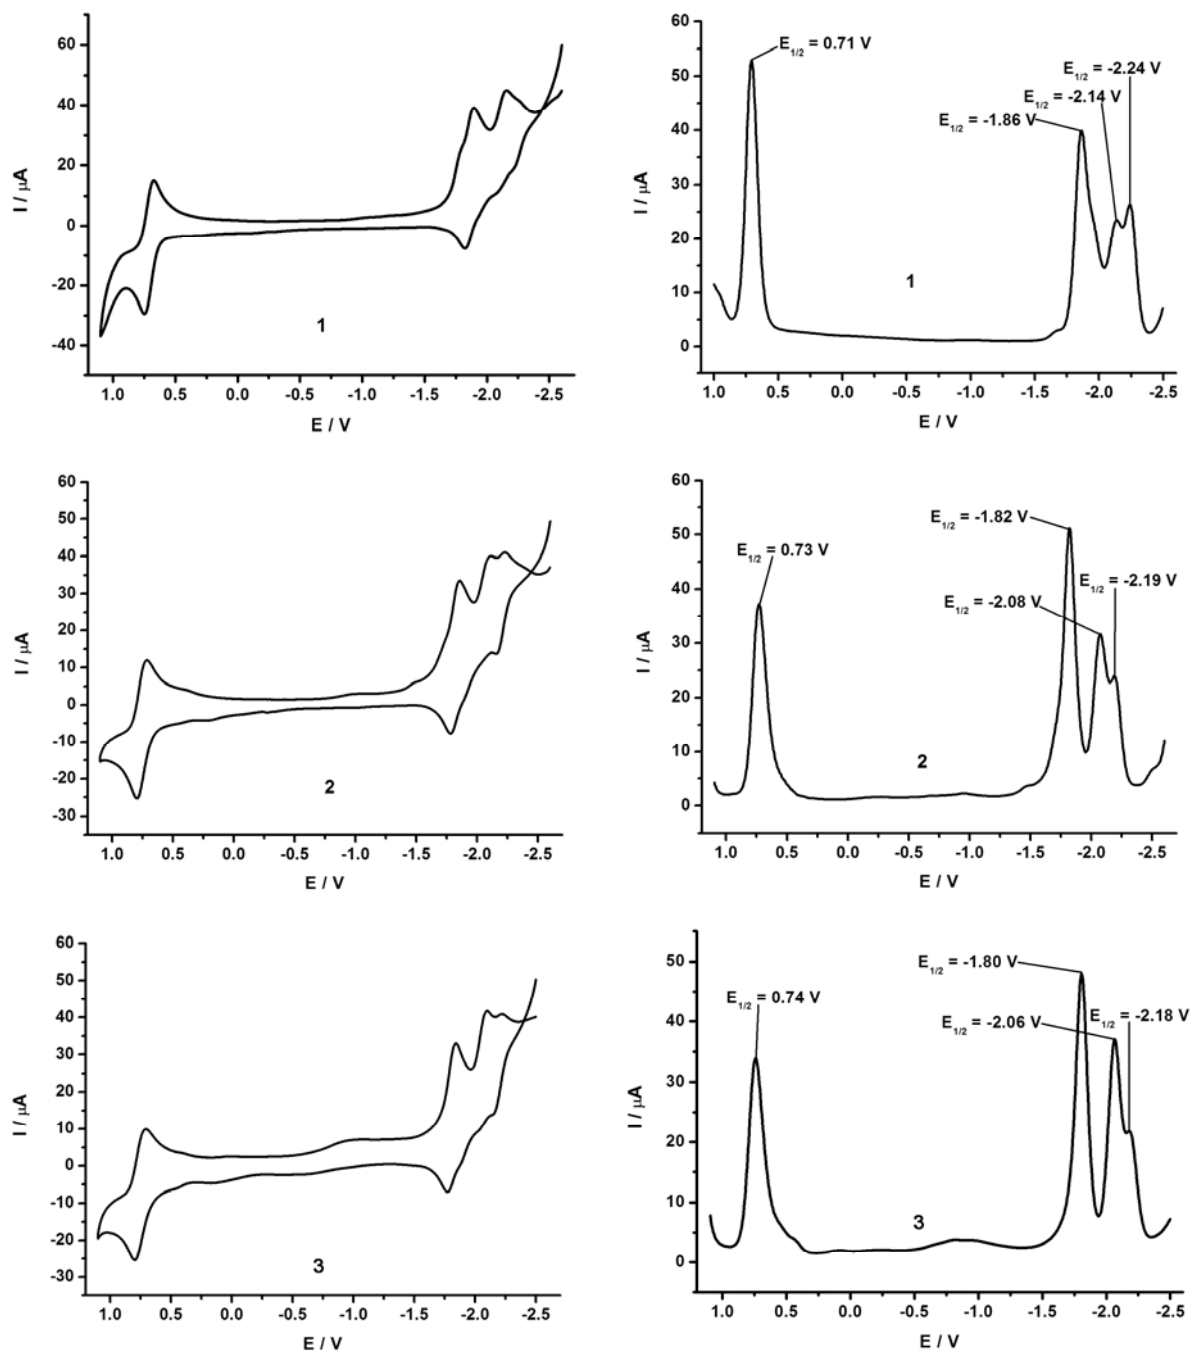

**Fig. S2** CV (left) and SWV (right) curves of **1**, **2** and **3** in acetonitrile with a scan rate of  $100 \text{ mV}\cdot\text{s}^{-1}$  at 298 K (vs. Ag/AgNO<sub>3</sub>)

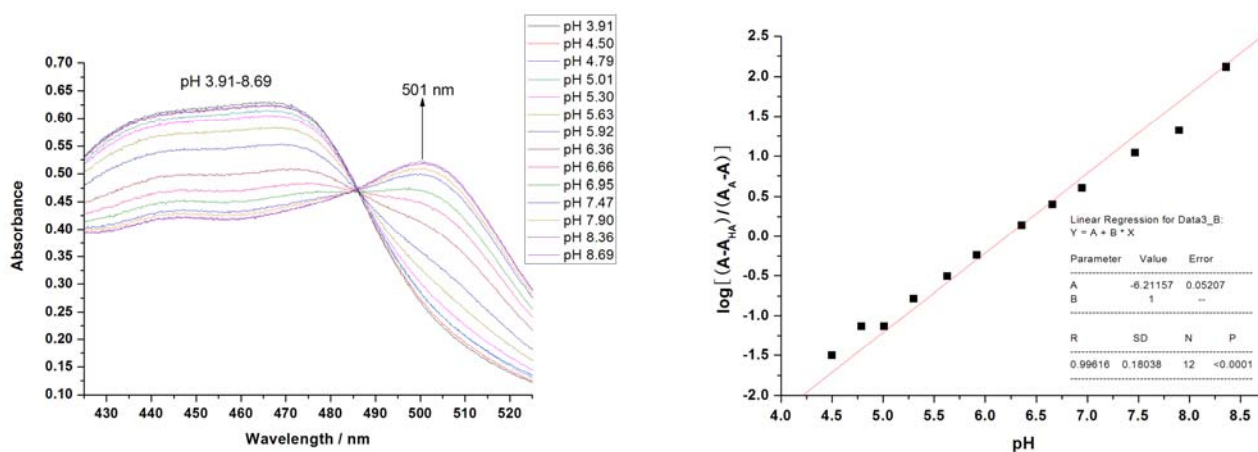

**Fig. S3** Determination of  $pK_{a1}$  of **3** by UV method. Left: Absorption spectral change as pH value increases. Right: Linear fitting of  $pK_a$  value.

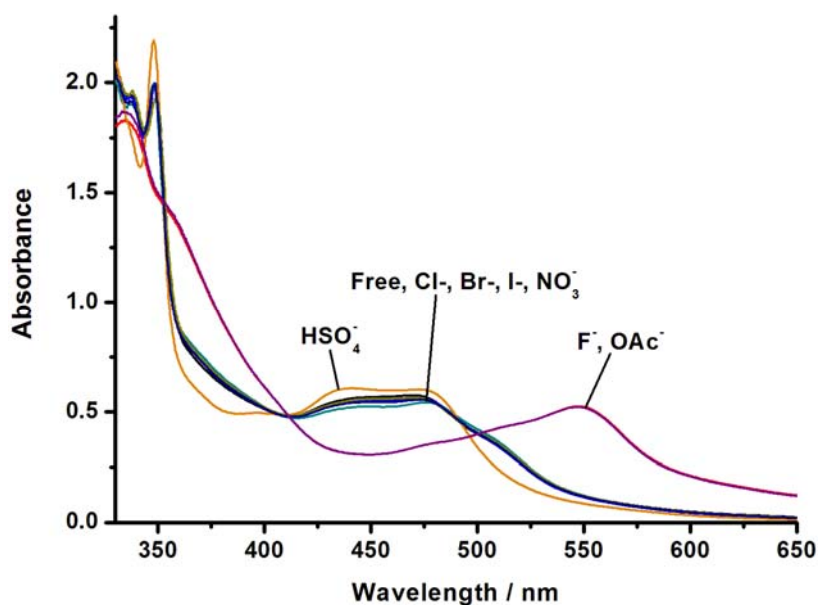

**Fig. S4** Absorption spectral changes of **3** ( $6 \times 10^{-5}$  mol·dm<sup>-3</sup>) in acetonitrile upon addition of 10 equiv of different anions.

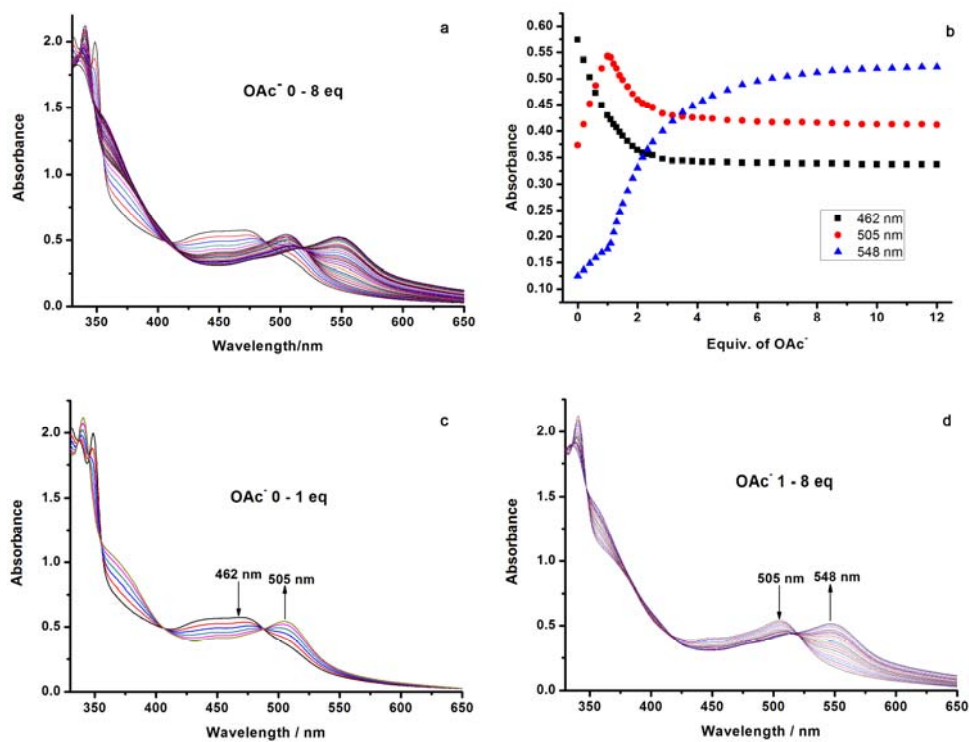

**Fig. S5** UV-vis titration of **3** ( $6 \times 10^{-5} \text{ mol} \cdot \text{dm}^{-3}$ ) in acetonitrile upon addition of  $\text{OAc}^-$  (a) 0 – 8 equiv, (c) 0 – 1 equiv, and (d) 1 – 8 equiv. (b) Absorbance at 462, 505 and 548 nm versus equivalents of  $\text{OAc}^-$ .

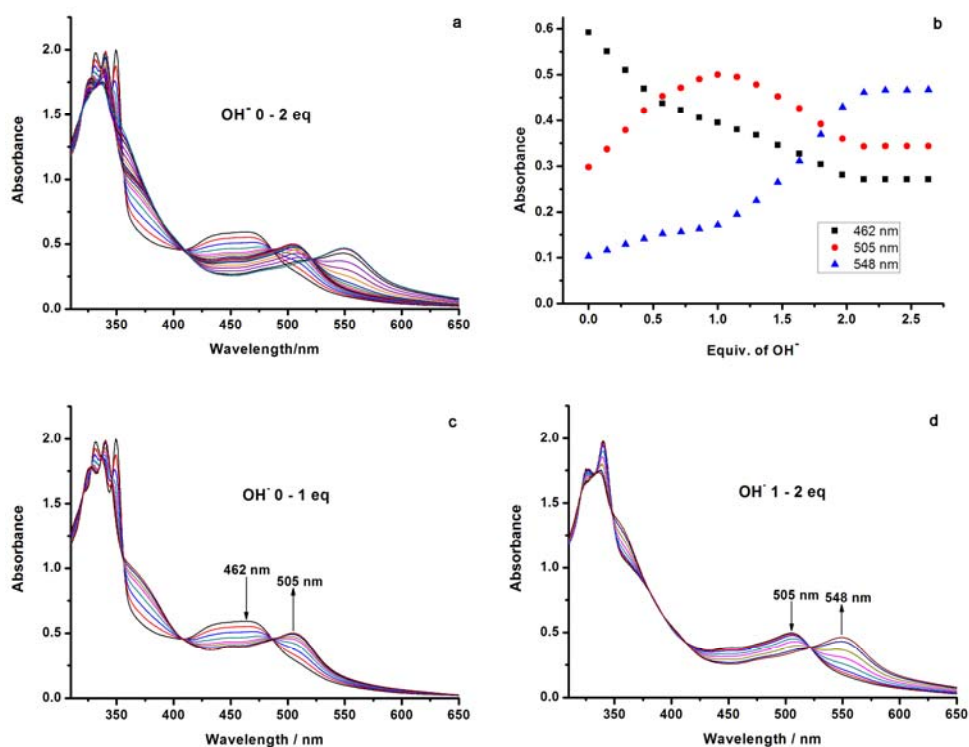

**Fig. S6** UV-vis titration of **3** ( $6 \times 10^{-5} \text{ mol} \cdot \text{dm}^{-3}$ ) in acetonitrile upon addition of  $\text{OH}^-$  (a) 0 – 2 equiv, (c) 0 – 1 equiv, and (d) 1 – 2 equiv. (b) Absorbance at 462, 505 and 548 nm versus equivalents of  $\text{OH}^-$ .

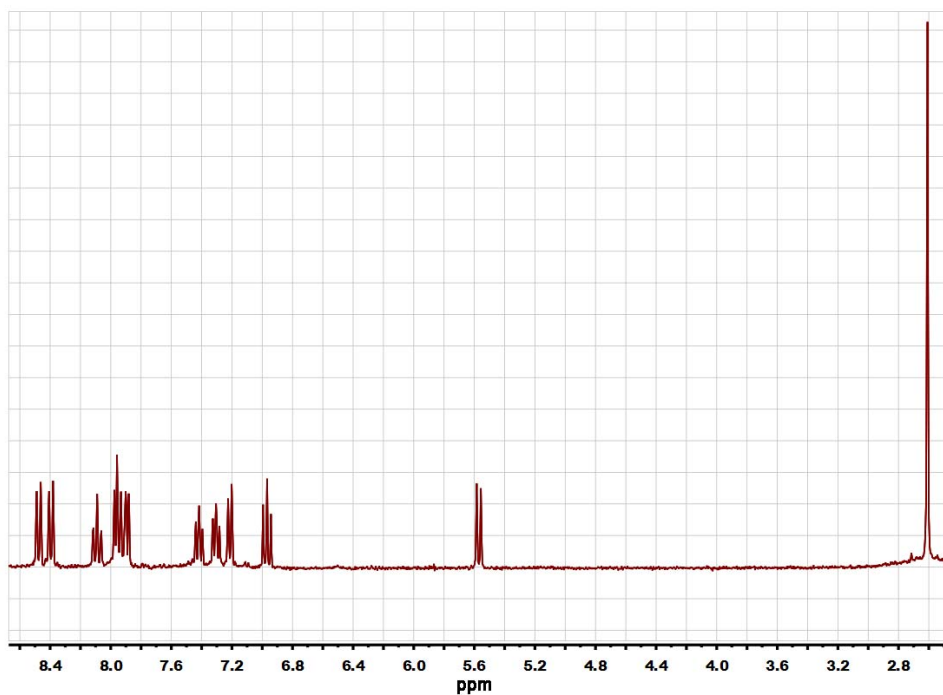

**Fig. S7**  $^1\text{H}$  NMR spectra of **3** in acetonitrile- $d_3$  (298K, 300 MHz).

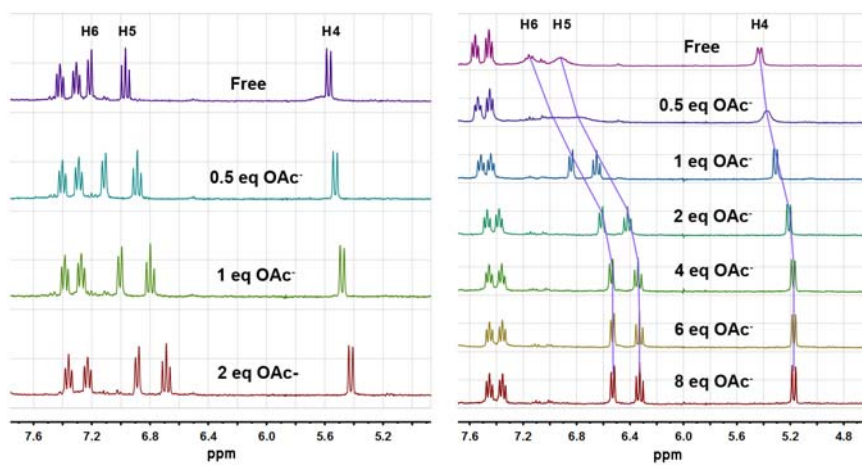

**Fig. S8**  $^1\text{H}$  NMR titration of **3** ( $0.003 \text{ mol}\cdot\text{dm}^{-3}$ ) in acetonitrile- $d_3$  (left) and DMSO- $d_6$  (right) with  $\text{OAc}^-$  (298K, 300MHz).

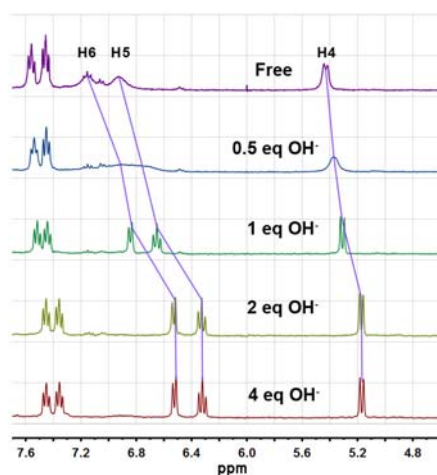

**Fig. S9**  $^1\text{H}$  NMR titration of **3** in  $\text{DMSO-}d_6$  ( $0.003 \text{ mol}\cdot\text{dm}^{-3}$ ) with  $\text{OH}^-$  (298K, 300MHz).

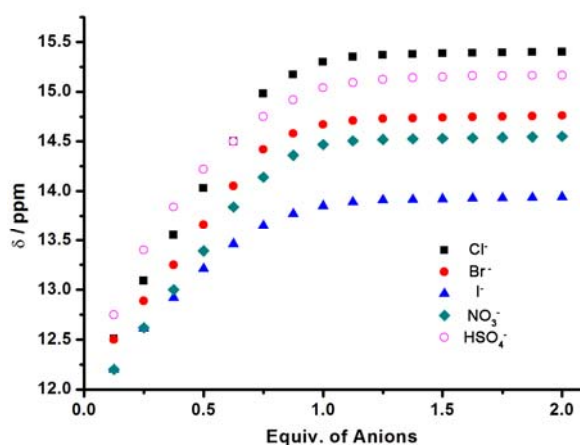

**Fig. S10** Chemical shift changes of the N-H signal of **3** ( $0.003 \text{ mol}\cdot\text{dm}^{-3}$  in acetonitrile- $d_3$ ) upon addition of  $\text{Cl}^-$ ,  $\text{Br}^-$ ,  $\text{I}^-$ ,  $\text{NO}_3^-$  and  $\text{HSO}_4^-$  anions.

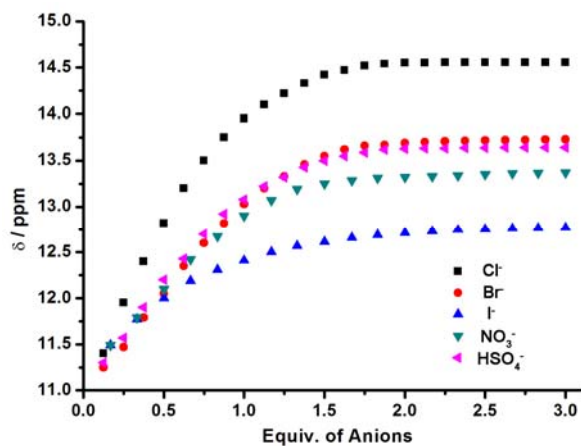

**Fig. S11** Chemical shift changes of the N-H signal of **1** ( $0.003 \text{ mol}\cdot\text{dm}^{-3}$  in acetonitrile- $d_3$ ) upon addition of  $\text{Cl}^-$ ,  $\text{Br}^-$ ,  $\text{I}^-$ ,  $\text{NO}_3^-$  and  $\text{HSO}_4^-$  anions.



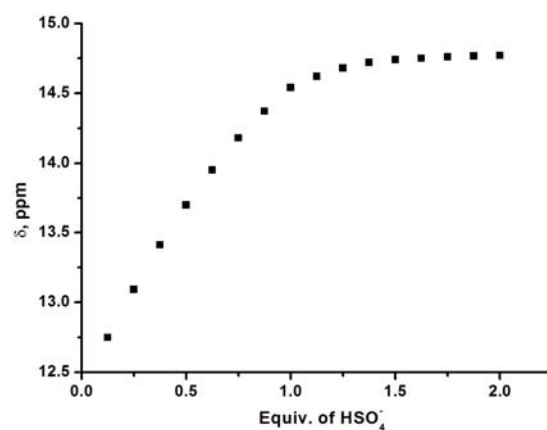

**Fig. S12** Chemical shift change of the N-H signal of **2** ( $0.003 \text{ mol}\cdot\text{dm}^{-3}$  in acetonitrile- $d_3$ ) upon addition of  $\text{HSO}_4^-$ .

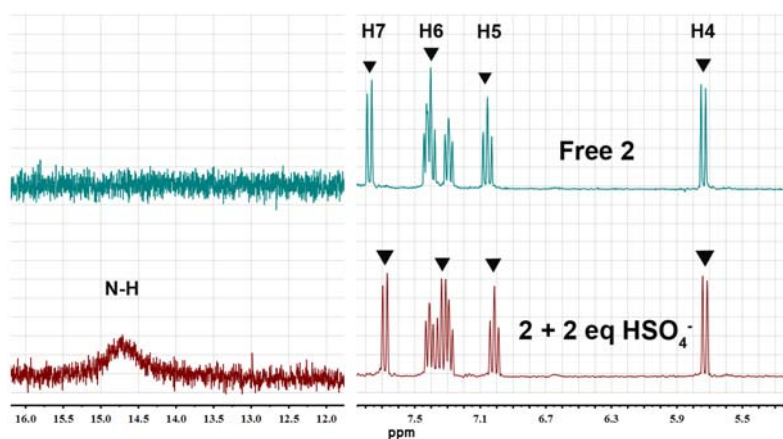

**Fig. S13**  $^1\text{H}$  NMR spectra of **2** ( $0.003 \text{ mol}\cdot\text{dm}^{-3}$  in acetonitrile- $d_3$ ) in the absence and presence of 2 equiv of  $\text{HSO}_4^-$  (298 K, 300 MHz)

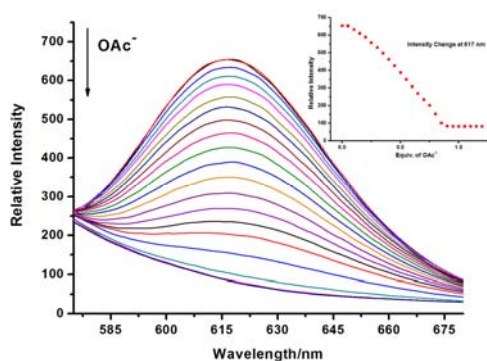

**Fig. S14** Emission spectral response of **3** ( $6 \times 10^{-5} \text{ mol}\cdot\text{dm}^{-3}$  in acetonitrile, 298K,  $\lambda_{\text{ex}} = 470 \text{ nm}$ ) upon addition of  $\text{OAc}^-$  anion. Inset: Intensity at 617 nm versus equiv of  $\text{OAc}^-$ .

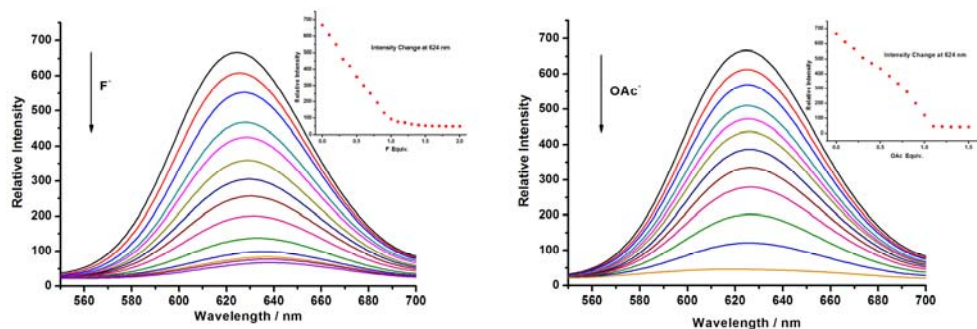

**Fig. S15** Emission spectral responses of **2** (6 × 10<sup>-5</sup> mol·dm<sup>-3</sup> in acetonitrile, 298K, λ<sub>ex</sub> = 470 nm) upon addition of F<sup>-</sup> (left) and OAc<sup>-</sup> (right). Insets: Intensity at 624 nm versus equiv of anions.

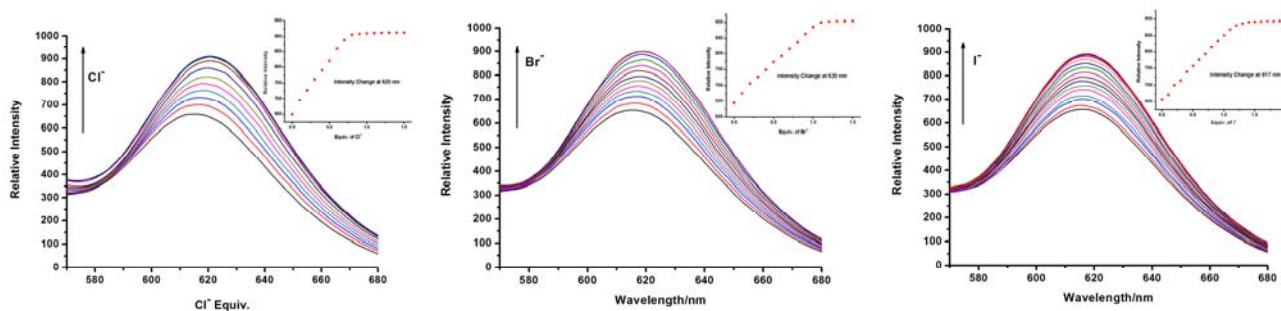

**Fig. S16** Emission spectral responses of **3** (6 × 10<sup>-5</sup> mol·dm<sup>-3</sup> in acetonitrile, 298K, λ<sub>ex</sub> = 470 nm) upon addition of Cl<sup>-</sup>, Br<sup>-</sup> and I<sup>-</sup> anions. Insets: Intensity at 620, 620 and 617 nm versus equiv of anions.

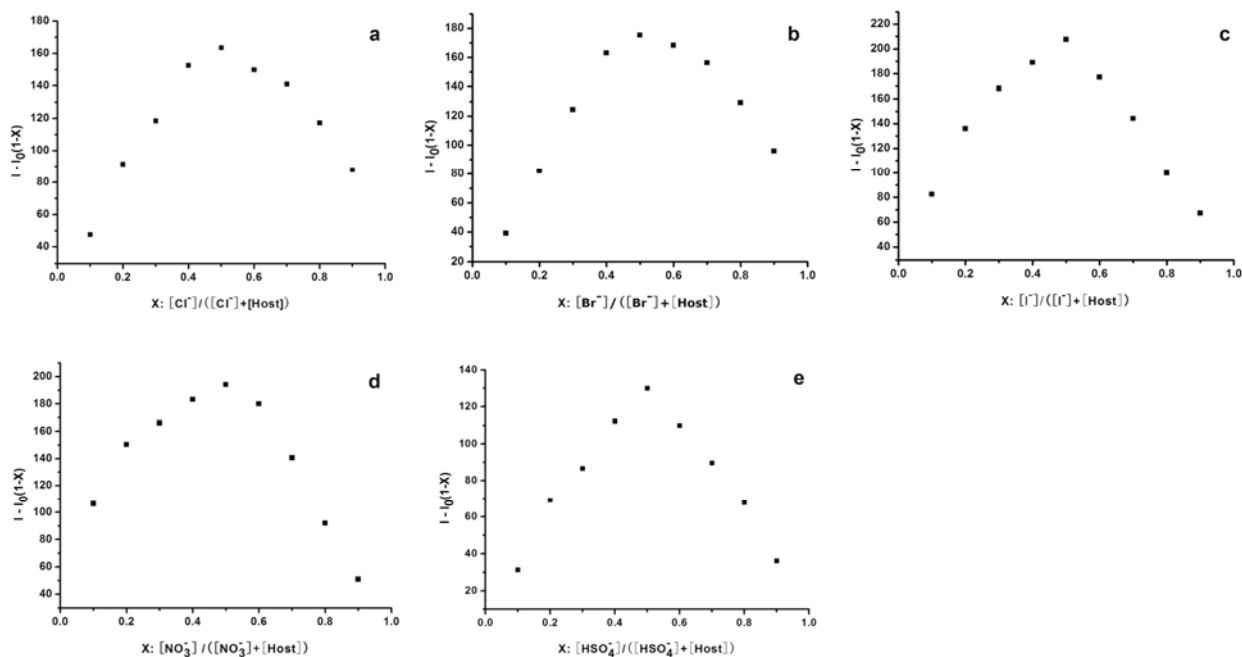

**Fig. S17** Job plot analyses for **3** and (a) Cl<sup>-</sup>, (b) Br<sup>-</sup>, (c) I<sup>-</sup>, (d) NO<sub>3</sub><sup>-</sup> and (e) HSO<sub>4</sub><sup>-</sup>.

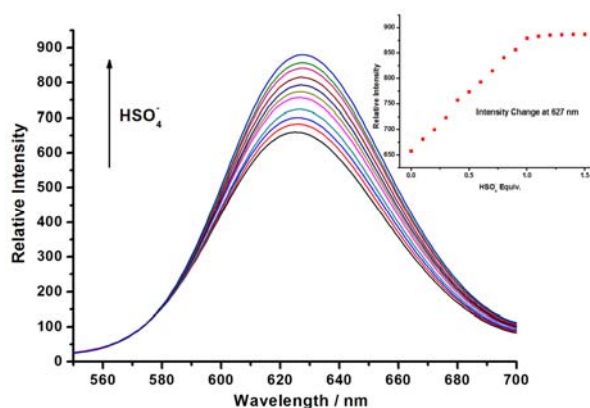

**Fig. S18** Emission spectral response of **2** ( $6 \times 10^{-5} \text{ mol} \cdot \text{dm}^{-3}$  in acetonitrile, 298K,  $\lambda_{\text{ex}} = 470 \text{ nm}$ ) upon addition of  $\text{HSO}_4^-$ . Inset: Intensity at 627 nm versus equiv of  $\text{HSO}_4^-$ .

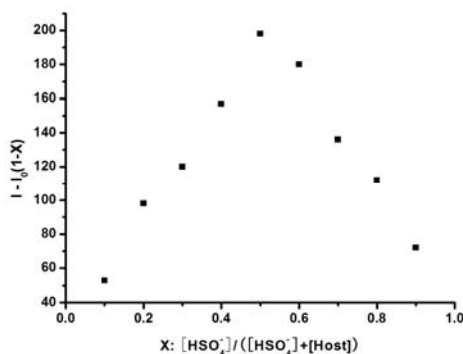

**Fig. S19** Job plot analysis for **2** and  $\text{HSO}_4^-$ .

**Table S2** Binding constants of **2** and **3** with 5 different anions in  $\text{CH}_3\text{CN}$  calculated from emission spectra (errors are given in parentheses) <sup>a</sup>

| Anion            | Log <i>K</i> |             |
|------------------|--------------|-------------|
|                  | <b>2</b>     | <b>3</b>    |
| $\text{Cl}^-$    | -            | 5.31 (0.05) |
| $\text{Br}^-$    | -            | 5.24 (0.07) |
| $\text{I}^-$     | -            | 5.21 (0.04) |
| $\text{NO}_3^-$  | -            | 5.18 (0.04) |
| $\text{HSO}_4^-$ | 5.16 (0.06)  | 5.20 (0.05) |

<sup>a</sup> Fitted to the equation<sup>6</sup> 
$$\Delta F = \frac{\Delta \varepsilon ([\text{H}] + [\text{G}] + \frac{1}{K}) \pm \sqrt{\Delta \varepsilon^2 ([\text{H}] + [\text{G}] + \frac{1}{K})^2 - 4 \Delta \varepsilon^2 [\text{H}][\text{G}]}}{2}$$

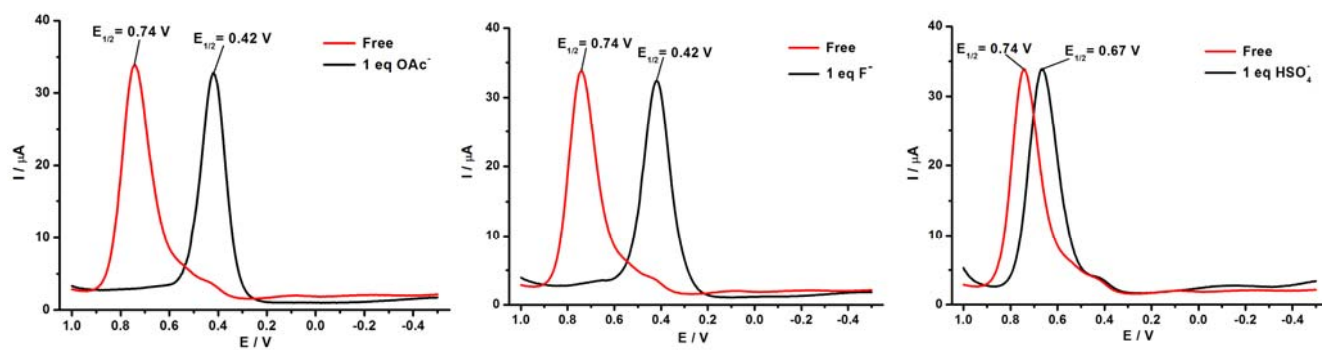

**Fig. S20** SWV measurements of **3** in acetonitrile ( $0.001 \text{ mol}\cdot\text{dm}^{-3}$ ) in the absence and presence of 1 equiv of  $\text{OAc}^-$ ,  $\text{F}^-$  or  $\text{HSO}_4^-$  (vs.  $\text{Ag}/\text{AgNO}_3$ ).

## References

1. K. Connors, *Binding constants: the measurement of molecular complex stability*, Wiley, New York, 1987.
2. B. Sullivan, D. Salmon, T. Meyer and J. Peedin, *Inorg. Chem.*, 1979, **18**, 3369-3374.
3. J. Van Houten and R. Watts, *J. Am. Chem. Soc.*, 1976, **98**, 4853-4858.
4. J. Calvert, J. Caspar, R. Binstead, T. Westmoreland and T. Meyer, *J. Am. Chem. Soc.*, 1982, **104**, 6620-6627.
5. D. Perrin and B. Dempsey, *Buffers for pH and metal ion control*, Chapman & Hall, London, 1974.
6. Y. Liu, B.-H. Han and Y.-T. Chen, *J. Phys. Chem. B*, 2002, **106**, 4678-4687.
